# Supplementary material for: Structural basis for high-affinity recognition of aflatoxin B1 by a DNA aptamer
Source: PubMed Central journal article supplement (PMC10415127; doi:10.1093/nar/gkad541), 2023-06-23
Supplement: gkad541_supplemental_file.pdf [file gkad541_supplemental_file.pdf]

## Supplemental Information

# Structural Basis for High-Affinity Recognition of Aflatoxin B1 by a DNA Aptamer

Guohua Xu<sup>1, †</sup>, Chen Wang<sup>1, 4, †</sup>, Hao Yu<sup>2, 4, †</sup>, Yapiao Li<sup>2, 4</sup>, Qiang Zhao<sup>2, 3, 4, \*</sup>, Xin Zhou<sup>1</sup>, Conggang Li<sup>1, \*</sup> and Maili Liu<sup>1</sup>

<sup>1</sup> Key Laboratory of Magnetic Resonance in Biological Systems, State Key Laboratory of Magnetic Resonance and Atomic and Molecular Physics, National Center for Magnetic Resonance in Wuhan, Wuhan National Laboratory for Optoelectronics, Wuhan Institute of Physics and Mathematics, Innovation Academy for Precision Measurement Science and Technology, Chinese Academy of Sciences, Wuhan, 430071, P. R. China.

<sup>2</sup> State Key Laboratory of Environmental Chemistry and Ecotoxicology, Research Center for Eco-Environmental Sciences, Chinese Academy of Sciences, Beijing, 100085, P. R. China.

<sup>3</sup> School of Environment, Hangzhou Institute for Advanced Study, UCAS, Hangzhou, 310024, P. R. China.

<sup>4</sup> University of Chinese Academy of Sciences, Beijing, 100049, P.R. China.

<sup>†</sup> These authors contributed equally to this work.

<sup>\*</sup> To whom correspondence should be addressed. Email: [conggangli@wipm.ac.cn](mailto:conggangli@wipm.ac.cn) (Conggang Li) [qiangzhao@rcees.ac.cn](mailto:qiangzhao@rcees.ac.cn) (Qiang Zhao)

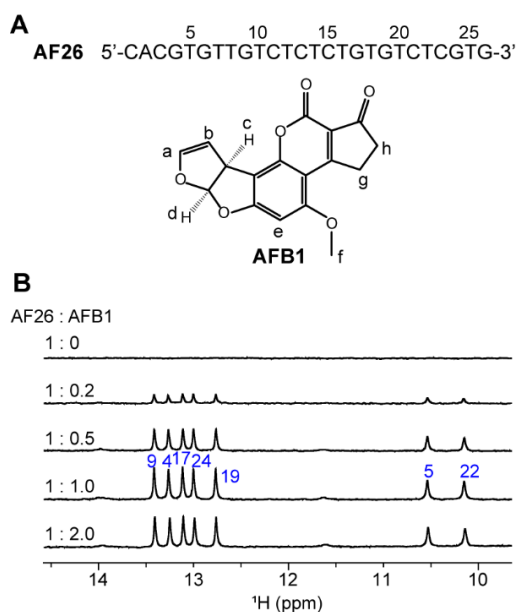

**Figure S1.**  $^1\text{H}$  NMR spectra of aptamer. (A) Sequence of aptamer AF26 and chemical structure of AFB1. (B) Imino regions of  $^1\text{H}$  NMR spectra of aptamer AF26 titrated with AFB1 at 298 K. The signal assignments of imino protons from bound aptamers were marked in blue fonts.

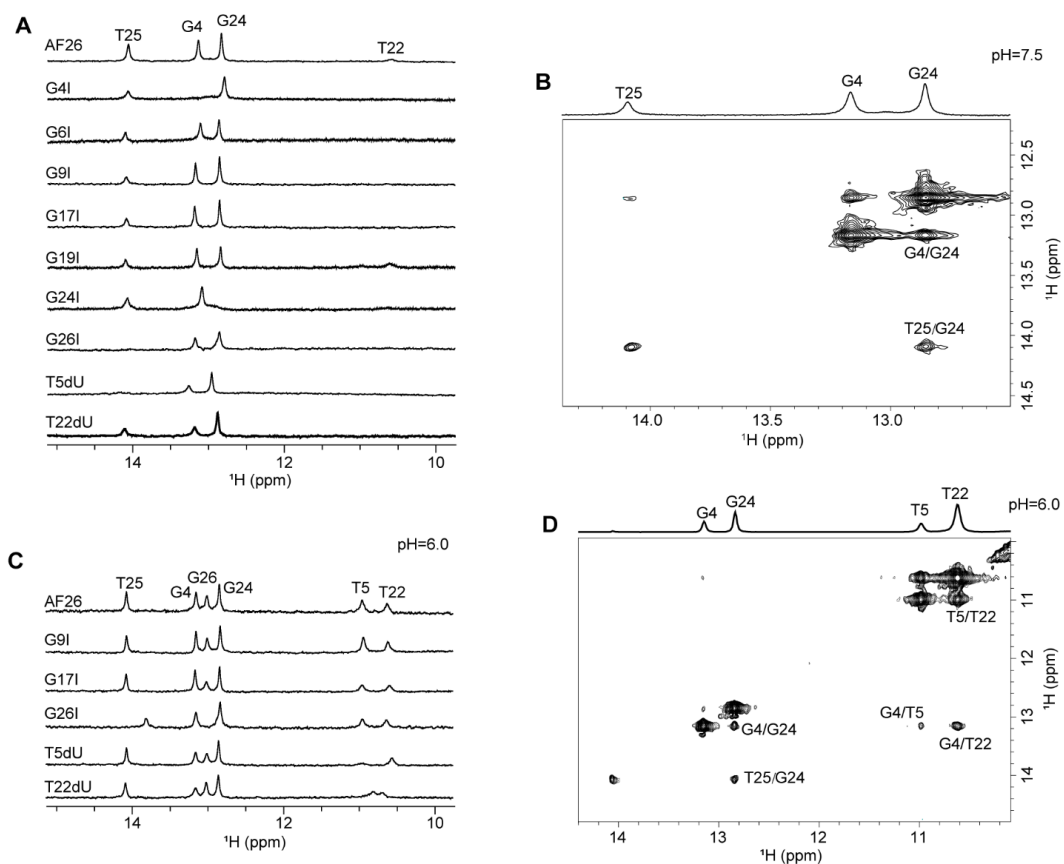

**Figure S2.** (A and C) Imino regions of  $^1\text{H}$  NMR spectra of free AF26 aptamer with G-to-I and T-to-dU substitution at pH 7.5 and 6.0, respectively. (B and D) NOESY spectrum (mixing time, 120 ms) of free AF26 in  $\text{H}_2\text{O}$  buffer at pH 7.5 and 6.0, respectively, showing the connectivities between the imino protons. All experiments were acquired at 278 K.

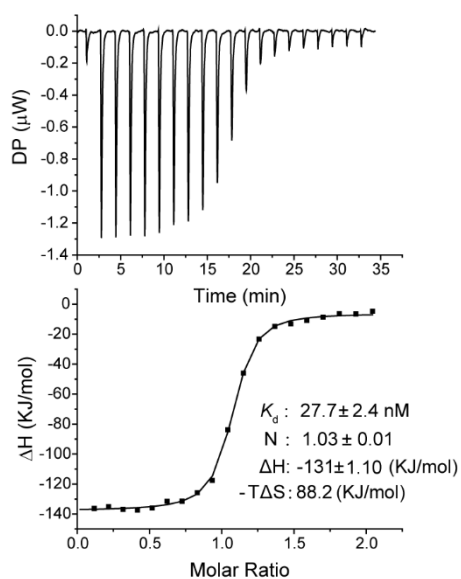

**Figure S3.** The ITC titration curves for the binding of AF26 aptamer and AFB1 at 298 K.

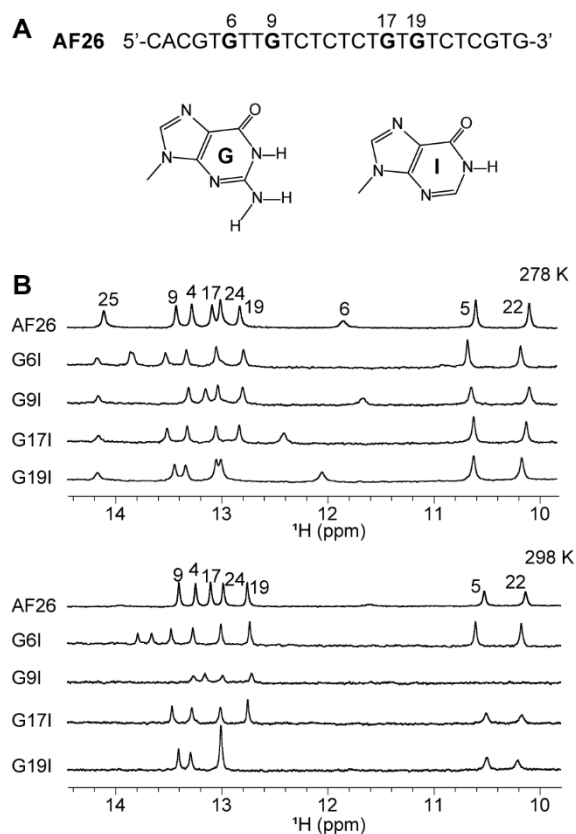

**Figure S4.**  $^1\text{H}$  NMR spectra of AF26 aptamer and its mutants. (A) Sequence of aptamer AF26 and chemical structure of G and I bases. (B) Imino regions of  $^1\text{H}$  NMR spectra of AF26 aptamer with the replacement of G by I in the presence of AFB1 at 278 K and 298 K.

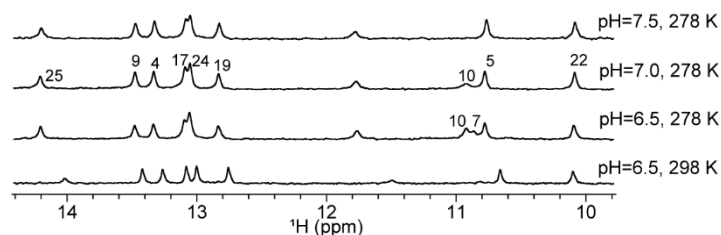

**Figure S5.** Imino regions of  $^1\text{H}$  NMR spectra of the AF26-afb1 complex at different pH.

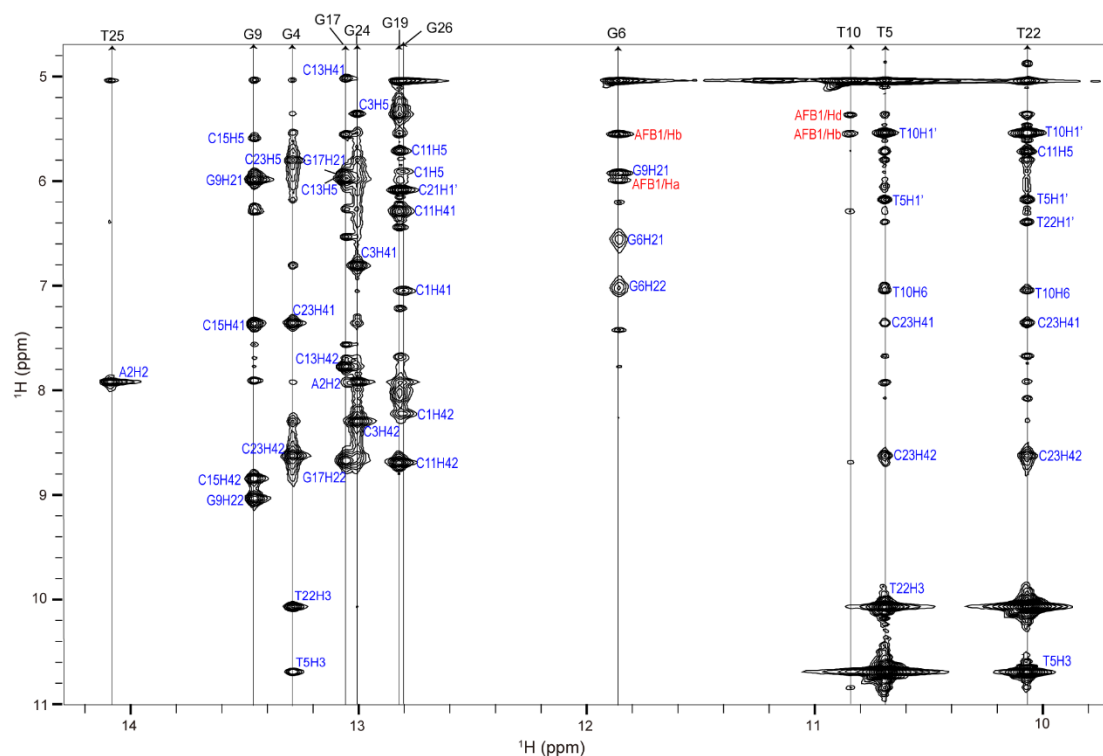

**Figure S6.** Expanded NOESY spectrum (mixing time, 120 ms) of AF26-afb1 complex in  $\text{H}_2\text{O}$  buffer at 278 K, showing the connectivities between the imino and the amino/base protons. The intermolecular cross peaks between AFB1 and AF26 protons were marked in red fonts.

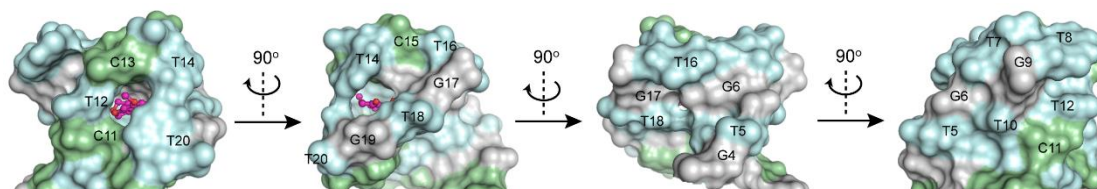

**Figure S7.** The surface view of AFB1 (stick) in binding cavity of aptamer AF26 showing that the AFB1 was tightly wrapped by binding pockets.

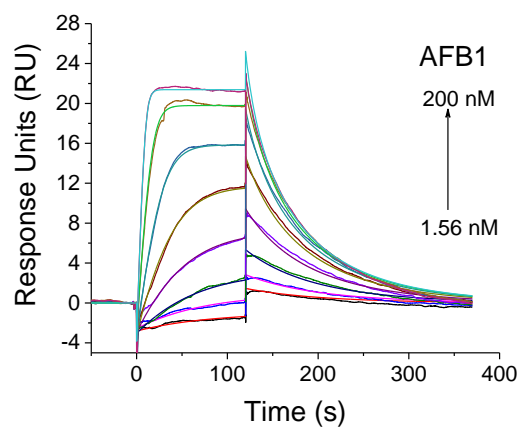

**Figure S8.** Sensorgrams of AFB1 at different concentrations ranging from 1.56 nM to 200 nM AFB1 in SPR analysis. Kinetic Analysis:  $k_{\text{on}}=2.11 \times 10^6 \text{ M}^{-1}\text{S}^{-1}$ ,  $k_{\text{off}}=0.046 \text{ S}^{-1}$ ;  $K_{\text{d}}=21.8 \text{ nM}$ .

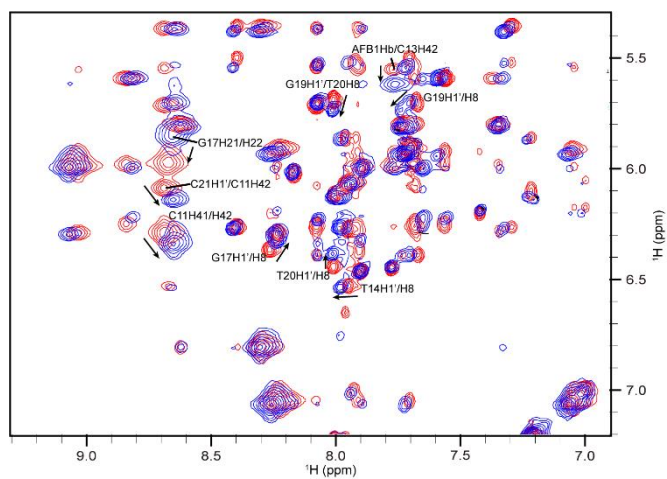

**Figure S9.** The overlap of 2D NOESY spectra of AF26-AFB1 (red) and AF26-AFG1 (blue) complexes in  $\text{H}_2\text{O}$  buffer at 278 K. The obviously moved peaks are labeled in the figure.

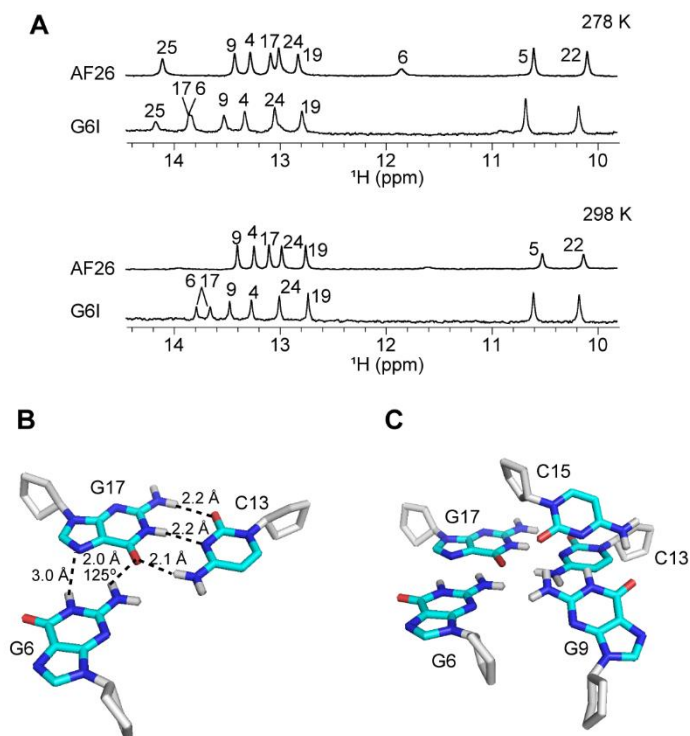

**Figure S10.** (A) The comparison of <sup>1</sup>H NMR spectra between AF26 and AF26-G6I mutant aptamers in the presence of AFB1 at 278 K and 298 K. (B) Hydrogen-bonding alignments of G6 G17 C13 triple. (C) The alignments of G6 G17 C13 triple and G9 C15 base pair.

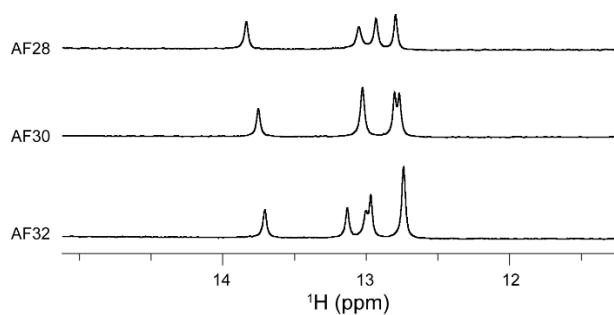

**Figure S11.** Imino regions of <sup>1</sup>H NMR spectra of free AF28, AF30 and AF32 aptamers at 298 K.

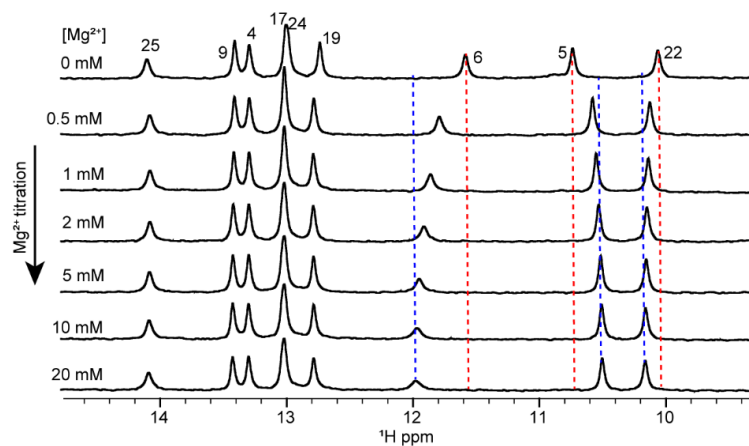

**Figure S12.** NMR titration experiments showing the effect of  $Mg^{2+}$  on the imino proton region of AF26 aptamer in the presence of 2 equivalent AFB1. NMR spectra were acquired in 10 mM Tris (pH 7.5) buffer at 278 K.

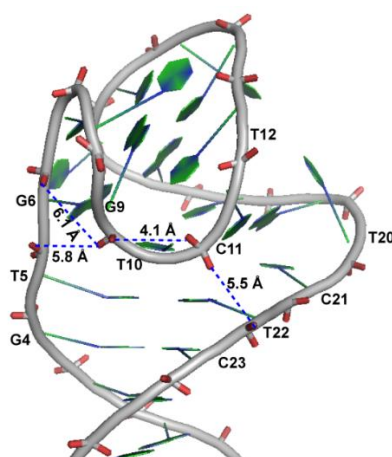

**Figure S13.** The mean structure of AF26-AFB1 complex showing the distances between negatively charged phosphate groups.

**Table S1.** Sequence and dissociation constant of aptamers determined by ITC at 298 K.

| Name | Sequence (5' to 3')                        | $K_d$ /nM          | $\Delta H$ (KJ/mol) | $-T\Delta S$ (KJ/mol) |
|------|--------------------------------------------|--------------------|---------------------|-----------------------|
| A32  | GGG CAC GTG TTG TCT CTC TGT GTC TCG TGC CC | $30.1 \pm 3.2$     | $-124 \pm 1.44$     | 81.2                  |
| A30  | GGC ACG TGT TGT CTC TCT GTG TCT CGT GCC    | $29.3 \pm 2.8$     | $-119 \pm 1.24$     | 76.1                  |
| A28  | GCA CGT GTT GTC TCT CTG TGTC TC GTG C      | $30.9 \pm 2.3$     | $-123 \pm 1.16$     | 79.5                  |
| A26  | CAC GTG TTG TCT CTC TGT GTC TCG TG         | $27.7 \pm 2.4$     | $-131 \pm 1.10$     | 88.2                  |
| A24  | ACG TGT TGT CTC TCT GTG TCT CGT            | $50 \pm 3.8$       | $-161 \pm 1.59$     | 118.8                 |
| A22  | CGT GTT GTC TCT CTG TGT CTC G              | $341 \pm 20$       | $-171 \pm 2.63$     | 133.9                 |
| A20  | GTG TTG TCT CTC TGT GTC TC                 | $2520 \pm 839$     | $-137 \pm 27.0$     | 104.6                 |
| A18  | TG TTG TCT CTC TGT GTC T                   | $1430 \pm 336$     | $-132 \pm 3.5$      | 98.7                  |
| A16  | G TTG TCT CTC TGT GTC                      | $21900 \pm 189000$ | $-335 \pm 5272$     | 307.9                 |

**Table S2.** AF26 aptamer and its variants sequences.

| Name         | Sequence (5' to 3')                                     |
|--------------|---------------------------------------------------------|
| AF26         | CAC GTG TTG TCT CTC TGT GTC TCG TG                      |
| AF26-G4I     | CAC <b>I</b> TG TTG TCT CTC TGT GTC TCG TG              |
| AF26-T5A     | CAC G <b>A</b> G TTG TCT CTC TGT GTC TCG TG             |
| AF26-T5-dU   | CAC G( <b>dU</b> )G TTG TCT CTC TGT GTC TCG TG          |
| AF26-G6I     | CAC G <b>T</b> I TTG TCT CTC TGT GTC TCG TG             |
| AF26-G6T     | CAC G <b>T</b> T TTG TCT CTC TGT GTC TCG TG             |
| AF26-G6A     | CAC G <b>T</b> A TTG TCT CTC TGT GTC TCG TG             |
| AF26-G6C     | CAC G <b>T</b> C TTG TCT CTC TGT GTC TCG TG             |
| AF26-T7-dU   | CAC GTG ( <b>dU</b> )TG TCT CTC TGT GTC TCG TG          |
| AF26-G9I     | CAC GTG T <b>I</b> T TCT CTC TGT GTC TCG TG             |
| AF26-G9T     | CAC GTG T <b>T</b> T TCT CTC TGT GTC TCG TG             |
| AF26-G9A     | CAC GTG T <b>T</b> A TCT CTC TGT GTC TCG TG             |
| AF26-G9C     | CAC GTG T <b>T</b> C TCT CTC TGT GTC TCG TG             |
| AF26-T10A    | CAC GTG TTG <b>A</b> CT CTC TGT GTC TCG TG              |
| AF26-T10-dU  | CAC GTG TTG ( <b>dU</b> )CT CTC TGT GTC TCG TG          |
| AF26-T12A    | CAC GTG TTG T <b>C</b> A CTC TGT GTC TCG TG             |
| AF26-T12-dU  | CAC GTG TTG T <b>C</b> ( <b>dU</b> ) CTC TGT GTC TCG TG |
| AF26-T14A    | CAC GTG TTG TCT <b>C</b> A C TGT GTC TCG TG             |
| AF26-T14-dU  | CAC GTG TTG TCT C( <b>dU</b> )C TGT GTC TCG TG          |
| AF26-T16-dU  | CAC GTG TTG TCT CTC ( <b>dU</b> )GT GTC TCG TG          |
| AF26-G17I    | CAC GTG TTG TCT CTC T <b>I</b> T GTC TCG TG             |
| AF26-G17T    | CAC GTG TTG TCT CTC T <b>T</b> T GTC TCG TG             |
| AF26-G17A    | CAC GTG TTG TCT CTC T <b>A</b> T GTC TCG TG             |
| AF26-G17C    | CAC GTG TTG TCT CTC T <b>C</b> T GTC TCG TG             |
| AF26-T18A    | CAC GTG TTG TCT CTC T <b>G</b> A GTC TCG TG             |
| AF26-T18-dU  | CAC GTG TTG TCT CTC T <b>G</b> ( <b>dU</b> ) GTC TCG TG |
| AF26-G19I    | CAC GTG TTG TCT CTC TGT <b>I</b> TC TCG TG              |
| AF26-G19T    | CAC GTG TTG TCT CTC TGT <b>T</b> TC TCG TG              |
| AF26-G19A    | CAC GTG TTG TCT CTC TGT <b>A</b> TC TCG TG              |
| AF26-G19C    | CAC GTG TTG TCT CTC TGT <b>C</b> TC TCG TG              |
| AF26-T20A    | CAC GTG TTG TCT CTC TGT GCC <b>A</b> CG TG              |
| AF26-T20C    | CAC GTG TTG TCT CTC TGT G <b>C</b> C TCG TG             |
| AF26-T20-5mC | CAC GTG TTG TCT CTC TGT G( <b>5mC</b> )C TCG TG         |
| AF26-T20-dU  | CAC GTG TTG TCT CTC TGT G ( <b>dU</b> )C TCG TG         |
| AF26-G24I    | CAC GTG TTG TCT CTC TGT GTC T <b>C</b> I TG             |
| AF26-T22A    | CAC GTG TTG TCT CTC TGT GTC <b>A</b> CG TG              |
| AF26-T22-dU  | CAC GTG TTG TCT CTC TGT GTC ( <b>dU</b> )CG TG          |
| AF26-C5G22   | CAC G <b>C</b> G TTG TCT CTC TGT GTC <b>G</b> CG TG     |
| AF26-G26I    | CAC GTG TTG TCT CTC TGT GTC T <b>C</b> I T <b>I</b>     |



**Table S3.** Proton chemical shift of AF26 in the AF26-AFB1 binary complex. The chemical shift values for carbon hydrogens and active hydrogens are from NMR spectra acquired in D<sub>2</sub>O buffer (pH 7.5) at 278 K and from NMR spectra acquired in H<sub>2</sub>O buffer (pH 7.5) at 278 K, respectively.

| Residue | H1/H3 | H41/H21<br>/H61 | H42/H22<br>/H62 | H5/Me<br>/H2 | H1'  | H2'  | H2'' | H3'  | H4'  | H5'  | H5'' | H8/H6 |
|---------|-------|-----------------|-----------------|--------------|------|------|------|------|------|------|------|-------|
| C1      |       | 7.05            | 8.22            | 5.90         | 5.51 | 1.93 | 2.37 | 4.70 | 4.06 | 3.77 | 3.77 | 7.70  |
| A2      |       |                 |                 | 7.92         | 6.27 | 2.80 | 2.93 | 5.04 | 4.44 | 4.14 | 4.01 | 8.40  |
| C3      |       | 6.81            | 8.30            | 5.35         | 5.52 | 1.83 | 2.17 | 4.83 | 4.13 | 4.26 | 4.00 | 7.30  |
| G4      | 13.29 |                 |                 |              | 6.05 | 2.72 | 2.64 | 5.04 | 4.42 | 4.12 | 4.00 | 7.93  |
| T5      | 10.69 |                 |                 | 1.72         | 6.18 | 1.73 | 2.83 | 5.06 | 4.09 |      |      | 6.99  |
| G6      | 11.86 | 6.56            | 7.02            |              | 6.29 | 3.11 | 2.70 | 5.16 | 5.25 | 4.09 | 4.36 | 8.24  |
| T7      |       |                 |                 | 1.87         | 5.79 | 1.80 | 2.25 | 4.61 | 3.33 | 3.66 | 3.72 | 7.35  |
| T8      |       |                 |                 | 1.88         | 6.44 | 2.29 | 2.48 | 4.53 | 4.53 | 4.08 | 3.99 | 7.78  |
| G9      | 13.46 | 5.98            | 9.03            |              | 6.02 | 2.85 | 2.85 | 5.06 | 4.53 | 3.97 | 4.19 | 8.17  |
| T10     | 10.84 |                 |                 | 0.66         | 5.54 | 1.67 | 1.62 | 4.87 | 4.26 | 3.98 | 3.98 | 7.04  |
| C11     |       | 6.29            | 8.69            | 5.71         | 6.26 | 1.12 | 2.28 | 4.70 | 4.38 | 4.10 | 3.93 | 8.08  |
| T12     | 7.90  |                 |                 | 1.68         | 6.26 | 2.61 | 2.47 | 5.05 | 4.23 | 4.07 | 4.02 | 7.57  |
| C13     |       | 5.03            | 7.77            | 5.96         | 6.27 | 2.12 | 2.62 | 5.08 | 4.54 | 4.16 | 4.22 | 7.68  |
| T14     |       |                 |                 | 2.08         | 6.52 | 2.18 | 2.29 | 4.83 | 4.44 | 4.27 | 4.19 | 7.96  |
| C15     |       | 7.36            | 8.84            | 5.58         | 5.92 | 1.91 | 2.35 | 4.64 | 3.47 | 4.07 | 4.02 | 7.56  |
| T16     |       |                 |                 | 1.62         | 6.20 | 1.99 | 2.44 | 4.70 | 4.39 | 3.33 | 2.80 | 7.43  |
| G17     | 13.05 | 5.97            | 8.67            |              | 6.36 | 2.98 | 2.81 | 5.11 | 4.36 | 4.22 | 4.19 | 8.27  |
| T18     |       |                 |                 | 2.01         | 6.46 | 2.37 | 2.66 | 4.99 | 4.53 | 4.30 | 4.21 | 7.91  |
| G19     | 12.82 |                 |                 |              | 5.69 | 2.54 | 2.28 | 5.04 | 4.45 | 4.25 | 4.14 | 7.68  |
| T20     |       |                 |                 | 2.06         | 6.44 | 1.96 | 2.17 | 4.69 | 4.39 | 4.27 | 4.12 | 8.02  |
| C21     |       |                 |                 | 5.21         | 6.08 | 1.70 | 2.34 | 4.61 | 3.65 | 3.81 | 3.99 | 7.22  |
| T22     | 10.07 |                 |                 | 1.90         | 6.39 | 1.83 | 1.46 | 4.75 | 4.12 | 3.85 | 3.39 | 7.68  |
| C23     |       | 7.36            | 8.62            | 5.79         | 4.99 | 2.46 | 2.40 | 4.89 | 4.28 | 4.06 | 4.01 | 7.73  |
| G24     | 13.01 |                 |                 |              | 6.11 | 2.68 | 2.82 | 5.04 | 4.44 | 4.15 | 4.15 | 8.01  |
| T25     | 14.09 |                 |                 | 1.55         | 5.86 | 1.94 | 2.35 | 4.89 | 4.19 | 4.26 | 4.19 | 7.22  |
| G26     | 12.81 |                 |                 |              | 6.08 | 2.69 | 2.42 | 4.72 | 4.22 | 4.11 | 4.15 | 7.96  |

**Table S4.** Proton chemical shifts of bound AFB1 and AFG1 in the AF26-AFB1/AFG1 binary complexes.

| Protons              | $\delta_H$ (AFB1) | $\delta_H$ (AFG1) |
|----------------------|-------------------|-------------------|
| Ha(CH)               | 5.99              | 6.01              |
| Hb(CH)               | 5.55              | 5.62              |
| Hc(CH)               | 4.31              | 4.39              |
| Hd(CH)               | 5.37              | 5.38              |
| He(CH)               | 6.08              | 6.10              |
| Hf(CH <sub>3</sub> ) | 3.73              | 3.73              |
| Hg(CH <sub>2</sub> ) | 2.55              | 3.90              |
| Hh(CH <sub>2</sub> ) | 2.07, 2.29        | 4.05              |

**Table S5.** Unambiguously assigned intermolecular NOEs between AFB1/AFG1 and AF26 aptamer protons in AF26-AFB1 complex.

| AFB1/AFG1 protons | AF26 protons in AF26-AFB1 complex | AF26 protons in AF26-AFG1 complex |
|-------------------|-----------------------------------|-----------------------------------|
| Ha                | T10-H6, Me                        | T10-H6, Me                        |
|                   | G6-H1                             | G6-H1                             |
|                   | T12-H3                            | T12-H3                            |
| Hb                | T10-Me, H3                        | T10-Me, H3                        |
|                   | G6-H1                             | G6-H1                             |
|                   | T12-H3                            | T12-H3                            |
| Hc                | T10-H3                            | T10-H3                            |
|                   | G19-H1                            | G19-H1                            |
|                   | C11-H42                           | C11-H42                           |
| Hd                | T10-H3, H6, H1', H2'/2'', H3'     | T10-H3, H6, H1', H2'/2'', H3'     |
|                   | C11-H5, H6, H42                   | C11-H5, H6, H42                   |
|                   | T12-H3                            | T12-H3                            |
|                   | G19-H1                            | G19-H1                            |
| He                | T12-H6, H1', H4', H5'/5''         | T12-H1', H4', H5'/5''             |
|                   | C13-H5, H6                        | C13-H5, H6                        |
|                   | C11-H6, H2'/2'', H3'              | C11-H6, H2'/2'', H3'              |
| Hf                | C13-H5, H6, H4', H5'              | C13-H5, H6, H4', H5'              |
|                   | T12-H1', H3', H4', H5'/5''        | T12-H6, H1', H3', H4', H5'/5''    |
|                   | G19-H1                            | G19-H1                            |
|                   | C11-H2'/2''                       | C11-H2'/2''                       |
| Hg                | T14-Me                            | T14-Me                            |
|                   | T20-Me                            | C13-H1'                           |
|                   |                                   | T20-Me, H6                        |
| Hh                |                                   | G19-H1', H8                       |
|                   | T14-Me                            | T14-Me                            |
|                   | T20-Me                            | T20-Me, H6                        |
|                   |                                   | G19-H1', H8                       |

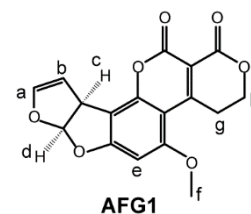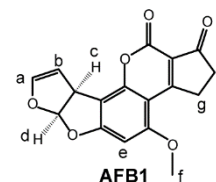

**Table S6.** Statistics of the computed ten structures of AF26-AFB1 and AF26-AFG1 complexes

|                                                    | <b>AF26-AFB1</b> | <b>AF26-AFG1</b> |
|----------------------------------------------------|------------------|------------------|
| <b>Distance restraints</b>                         |                  |                  |
| Intraresidue                                       | 80               | 80               |
| Sequential                                         | 147              | 147              |
| Long-range                                         | 119              | 119              |
| Intermolecular                                     | 49               | 53               |
| <b>Other restraints</b>                            |                  |                  |
| Hydrogen bond restraints                           | 61               | 61               |
| Sugar pucker restraints                            | 52               | 52               |
| Dihedral angles                                    | 68               | 68               |
| <b>Repulsive restraints</b>                        | 4                | 4                |
| <b>NOE violations</b>                              |                  |                  |
| Number (>0.2 Å)                                    | 0                | 0                |
| RMSD of violations (Å)                             | 0.021 ±0.002     | 0.022 ±0.002     |
| <b>Deviations from the ideal covalent geometry</b> |                  |                  |
| Bond lengths (Å)                                   | 0.002 ±0.000     | 0.002 ±0.000     |
| Bond angles (deg)                                  | 0.417 ±0.006     | 0.419 ±0.008     |
| Impropers (deg)                                    | 0.293 ±0.006     | 0.320 ±0.003     |
| <b>Pairwise all heavy atoms RMSD values (Å)</b>    |                  |                  |
| Entire complex                                     | 0.54±0.17        | 0.75±0.28        |
| Entire complex less ligands                        | 0.55 ±0.17       | 0.76 ±0.28       |

**Table S7.** The dissociation constant of AF26 aptamer and its variants determined by ITC.

| Aptamer     | $K_d$ / nM      | $\Delta H$ (KJ/mol) | $-T\Delta S$ (KJ/mol) |
|-------------|-----------------|---------------------|-----------------------|
| AF26        | 27.7 $\pm$ 2.4  | -131 $\pm$ 1.10     | 88.2                  |
| AF26-T5A    | 145 $\pm$ 15.4  | -104 $\pm$ 2.18     | 64.9                  |
| AF26-T5-dU  | 34.8 $\pm$ 4.0  | -134 $\pm$ 1.68     | 91.6                  |
| AF26-G6I    | 19.8 $\pm$ 3.25 | -150 $\pm$ 2.19     | 106                   |
| AF26-G6C    | NB              |                     |                       |
| AF26-G6A    | NB              |                     |                       |
| AF26-G6T    | 2880 $\pm$ 5460 | -39.5 $\pm$ 39.9    | 7.87                  |
| AF26-T7A    | NB              |                     |                       |
| AF26-T7-dU  | 69.4 $\pm$ 10.9 | -126 $\pm$ 2.87     | 85.3                  |
| AF26-G9T    | NB              |                     |                       |
| AF26-G9A    | NB              |                     |                       |
| AF26-G9C    | NB              |                     |                       |
| AF26-G9I    | NB              |                     |                       |
| AF26-T10A   | NB              |                     |                       |
| AF26-T10-dU | 248 $\pm$ 41    | -124 $\pm$ 4.55     | 86.0                  |
| AF26-T12A   | NB              |                     |                       |
| AF26-T12-dU | 68.8 $\pm$ 13.4 | -135 $\pm$ 3.35     | 93.7                  |
| AF26-T14A   | 1530 $\pm$ 511  | -122 $\pm$ 16.8     | 88.7                  |
| AF26-T14-dU | 58.0 $\pm$ 6.0  | -136 $\pm$ 1.72     | 95.1                  |
| AF26-T16A   | 2840 $\pm$ 2190 | -118 $\pm$ 44.8     | 86.2                  |
| AF26-T16-dU | 101 $\pm$ 15.8  | -126 $\pm$ 3.09     | 86.0                  |
| AF26-G17I   | 401 $\pm$ 41.0  | -151 $\pm$ 3.8      | 114                   |
| AF26-G17C   | NB              |                     |                       |
| AF26-G17T   | NB              |                     |                       |
| AF26-G17A   | NB              |                     |                       |
| AF26-T18A   | 2000 $\pm$ 1500 | -52.3 $\pm$ 17.8    | 19.9                  |
| AF26-T18-dU | 30.5 $\pm$ 5.4  | -125 $\pm$ 2.33     | 82.0                  |
| AF26-G19I   | 345 $\pm$ 40.1  | -134 $\pm$ 3.64     | 97.0                  |
| AF26-G19T   | 2000 $\pm$ 1500 | -44.8 $\pm$ 105     | 14.5                  |
| AF26-G19A   | NB              |                     |                       |
| AF26-G19C   | NB              |                     |                       |
| AF26-T20A   | 3280 $\pm$ 3780 | -64.0 $\pm$ 37.0    | 32.9                  |
| AF26-T20-dU | 46.0 $\pm$ 5.5  | -120 $\pm$ 1.68     | 77.7                  |
| AF26-T22A   | 103 $\pm$ 18    | -163 $\pm$ 4.16     | 123.0                 |
| AF26-T22-dU | 38.4 $\pm$ 8.1  | -135 $\pm$ 3.09     | 93.1                  |
| AF26-C5G22  | 158 $\pm$ 20.1  | -131 $\pm$ 2.85     | 92.0                  |

*NB*: no binding.

**Table S8.** The dissociation constant of AF26 aptamer and its variants determined by ITC.

| Aptamer      | $K_d$ for AFB1/ nM | $K_d$ for AFG1/ nM | $K_d$ (AFG1)/ $K_d$ (AFB1) |
|--------------|--------------------|--------------------|----------------------------|
| AF26         | 27.7±2.4           | 144±26.8           | 5.2                        |
| AF26-T20-dU  | 46.0±5.5           | 367±42.6           | 8                          |
| AF26-T20C    | 19.1±3.1           | 333±54.8           | 17.4                       |
| AF26-T20-5mC | 16.1±2.5           | 174±27.1           | 10.8                       |

**Table S9.** The dissociation constant of AF26 aptamer determined by ITC at various temperatures, showing the effect of temperature on the dissociation constant.

| Temperature /°C | $K_d$ / nM | $\Delta H$ (KJ/mol) | -T $\Delta S$ (KJ/mol) | $\Delta S$ (KJ/mol) |
|-----------------|------------|---------------------|------------------------|---------------------|
| 5               | 4.3 ± 1.9  | -74.8 ± 1.58        | 30.2                   | -0.109              |
| 10              | 5.7 ± 2.0  | -91.3 ± 1.95        | 46.5                   | -0.164              |
| 15              | 12.6 ± 2.7 | -101 ± 1.7          | 57.6                   | -0.200              |
| 20              | 17.2 ± 3.3 | -111 ± 2.33         | 67.7                   | -0.231              |
| 25              | 27.7 ± 2.4 | -131 ± 1.10         | 88.2                   | -0.296              |
| 30              | 56.5 ± 5.0 | -153 ± 1.87         | 111                    | -0.366              |
| 35              | 162 ± 15.8 | -186 ± 3.27         | 145                    | -0.471              |

**Table S10.** The dissociation constant of AF26 aptamer determined by ITC at various MgCl<sub>2</sub> concentration, showing the effect of MgCl<sub>2</sub> concentration on the dissociation constant.

| MgCl <sub>2</sub> concentration / mM | $K_d$ / nM | $\Delta H$ (KJ/mol) | -T $\Delta S$ (KJ/mol) |
|--------------------------------------|------------|---------------------|------------------------|
| 0                                    | 1180±303   | -210 ± 20.4         | 176                    |
| 2                                    | 42.0±8.6   | -141 ± 3.22         | 99.2                   |
| 10                                   | 28.7±6.2   | -137 ± 2.85         | 94.3                   |
| 50                                   | 24.2±5.1   | -140 ± 2.65         | 96.8                   |

Binding buffer: 10 mM Tris-HCl (7.5), 2% DMSO, 0.1% Tween20, at 25 °C
